# Supplementary material
Source: PubMed Central journal article supplement (PMC3353137)
Supplement: supp_kwr467_kwr467_Web_Tables.pdf [file supp_kwr467_kwr467_Web_Tables.pdf]

**Web Table 1. Direct and indirect effects on lung cancer and assessment of variant-smoking interaction for rs8034191**

|                                    | Original Study   |                      | Replication       |                      |                  |                      | Toronto           |         |                       | Meta-Analysis    |       |
|------------------------------------|------------------|----------------------|-------------------|----------------------|------------------|----------------------|-------------------|---------|-----------------------|------------------|-------|
|                                    | MGH              |                      | MD Anderson       |                      | IARC             |                      |                   |         | Overall Replication   |                  |       |
|                                    | OR               | P-Value              | OR                | P-Value              | OR               | P-Value              | OR                | P-Value | P-Value               | Pooled OR        | P-Val |
| <b>w/o SNPxSmoking Interaction</b> |                  |                      |                   |                      |                  |                      |                   |         |                       |                  |       |
| Direct Effect                      | 1.35 (1.21,1.52) | 3.1x10 <sup>-7</sup> | 1.18 (1.08, 1.29) | 2.0x10 <sup>-4</sup> | 1.26 (1.14,1.40) | 5.4x10 <sup>-6</sup> | 1.33 (1.02,1.73)  | 0.04    | 4.7x10 <sup>-10</sup> | 1.26 (1.19,1.33) | 1.8x  |
| Indirect Effect                    | 1.01 (0.99,1.02) | 0.15                 | 1.01 (0.99,1.03)  | 0.13                 | 1.00 (0.99,1.02) | 0.95                 | 1.00 (0.99,1.01)  | 0.87    | 0.23                  | 1.01 (1.00,1.01) |       |
| Total Effect                       | 1.36 (1.22,1.54) | 1.5x10 <sup>-7</sup> | 1.19 (1.09,1.30)  | 8.8x10 <sup>-5</sup> | 1.26 (1.14,1.40) | 6.4x10 <sup>-6</sup> | 1.33 (1.02,1.74)  | 0.03    | 2.6x10 <sup>-10</sup> | 1.26 (1.19,1.34) | 6.7x  |
| Proportion Mediated                |                  | 3.6%                 |                   | 6.8%                 |                  | 0.2%                 |                   | 0.4%    |                       |                  | 3.2%  |
| <b>w/ SNPxSmoking Interaction</b>  |                  |                      |                   |                      |                  |                      |                   |         |                       |                  |       |
| T/C vs. TT Direct Effect           | 1.31 (1.15,1.49) | 3.1x10 <sup>-5</sup> | 1.08 (0.97,1.21)  | 0.15                 | 1.24 (1.11,1.38) | 1.8x10 <sup>-4</sup> | 1.30 (0.99,1.71)  | 0.06    | 8.4x10 <sup>-5</sup>  | 1.20 (1.12,1.28) | 5.6   |
| T/C vs. TT Indirect Effect         | 1.01 (0.99,1.02) | 0.15                 | 1.01 (0.99,1.03)  | 0.13                 | 1.00 (0.99,1.02) | 0.95                 | 1.00 (0.99,1.01)  | 0.78    | 0.22                  | 1.01 (1.00,1.01) |       |
| T/C vs. TT Total Effect            | 1.32 (1.16,1.50) | 1.6x10 <sup>-5</sup> | 1.10 (0.98,1.23)  | 0.10                 | 1.24 (1.11,1.39) | 2.0x10 <sup>-4</sup> | 1.30 (-.99,1.71)  | 0.06    | 4.8x10 <sup>-5</sup>  | 1.21 (1.13,1.29) | 1.9   |
| Proportion Mediated                |                  | 4.2%                 |                   | 13.0%                |                  | 0.3%                 |                   | 0.7%    |                       |                  | 4.2%  |
| C/C vs. TT Direct Effect           | 1.72 (1.34,2.21) | 2.1x10 <sup>-5</sup> | 1.18 (0.96,1.47)  | 0.11                 | 1.53 (1.23,1.92) | 1.5x10 <sup>-4</sup> | 1.70 (0.99,2.93)  | 0.06    | 4.8x10 <sup>-5</sup>  | 1.44 (1.27,1.63) | 2.3   |
| C/C vs. TT Indirect Effect         | 1.03 (0.99,1.07) | 0.16                 | 1.03 (0.99,1.07)  | 0.13                 | 1.00 (0.97,1.04) | 0.95                 | 1.00 (0.97,1.05)  | 0.61    | 0.2                   | 1.02 (1.00,1.04) |       |
| C/C vs. TT Total Effect            | 1.77 (1.38,2.26) | 6.7x10 <sup>-6</sup> | 1.22 (0.98,1.51)  | 0.07                 | 1.54 (1.23,1.92) | 1.7x10 <sup>-4</sup> | 1.72 (1.00,2.94)  | 0.05    | 2.1x10 <sup>-5</sup>  | 1.46 (1.29,1.66) | 4.4   |
| Proportion Mediated                |                  | 6.3%                 |                   | 15.2%                |                  | 0.3%                 |                   | 2.3%    |                       |                  | 5.6%  |
| Additive Interaction               | 0.06 (0.02,0.10) | 1x10 <sup>-3</sup>   | 0.05 (0.03,0.08)  | 1.8x10 <sup>-5</sup> | 0.07 (0.03,0.10) | 1.0x10 <sup>-4</sup> | 0.04 (-0.06,0.15) | 0.48    | 5.6x10 <sup>-8</sup>  | 0.06 (0.04,0.08) | 2.3x  |
| Multiplicative Interaction         | 1.04 (0.98,1.09) | 0.17                 | 1.05 (1.01,1.09)  | 0.01                 | 1.03 (0.96,1.09) | 0.42                 | 1.04 (0.93,1.15)  | 0.51    | 0.03                  | 1.04 (1.01,1.07) |       |

**Web Table 2. Direct and indirect effects on lung cancer and assessment of variant-smoking interaction for rs1051730**

|                                    | Original Study   |                      | Replication       |                      |                  |                      | Meta-Analysis     |         |                       |                  |       |
|------------------------------------|------------------|----------------------|-------------------|----------------------|------------------|----------------------|-------------------|---------|-----------------------|------------------|-------|
|                                    | MGH              |                      | MD Anderson       |                      | IARC             |                      | Toronto           |         | Overall               |                  |       |
|                                    | OR               | P-Value              | OR                | P-Value              | OR               | P-Value              | OR                | P-Value | Replication           | Pooled           | P-Val |
| <b>w/o SNPxSmoking Interaction</b> |                  |                      |                   |                      |                  |                      |                   |         |                       |                  |       |
| Direct Effect                      | 1.32 (1.18,1.48) | 1.8x10 <sup>-6</sup> | 1.19 (1.09,1.30)  | 1.0x10 <sup>-4</sup> | 1.27 (1.14,1.40) | 4.1x10 <sup>-6</sup> | 1.42 (1.09,1.86)  | 0.01    | 7.7x10 <sup>-11</sup> | 1.26 (1.19,1.33) | 1.1x  |
| Indirect Effect                    | 1.01 (0.99,1.02) | 0.19                 | 1.01 (0.99,1.02)  | 0.26                 | 1.00 (0.98,1.01) | 0.87                 | 1.00 (0.99,1.01)  | 0.82    | 0.45                  | 1.00 (0.99,1.01) |       |
| Total Effect                       | 1.33 (1.19,1.50) | 1.0x10 <sup>-6</sup> | 1.20 (1.10,1.31)  | 5.8x10 <sup>-5</sup> | 1.27 (1.14,1.40) | 5.9x10 <sup>-6</sup> | 1.42 (1.09,1.86)  | 0.01    | 5.6x10 <sup>-11</sup> | 1.26 (1.19,1.34) | 4.4x  |
| Proportion Mediated                | 3.5%             |                      | 4.9%              |                      | 0.0%             |                      | 0.4%              |         |                       | 2.3%             |       |
| <b>w/ SNPxSmoking Interaction</b>  |                  |                      |                   |                      |                  |                      |                   |         |                       |                  |       |
| A/G vs. GG Direct Effect           | 1.29 (1.14,1.46) | 7.6x10 <sup>-5</sup> | 1.09 (0.98,1.22)  | 0.12                 | 1.24 (1.10,1.38) | 2.0x10 <sup>-4</sup> | 1.41 (1.07,1.87)  | 0.01    | 3.4x10 <sup>-5</sup>  | 1.20 (1.12,1.28) | 3.7:  |
| A/G vs. GG Indirect Effect         | 1.01 (0.99,1.02) | 0.19                 | 1.01 (0.99,1.02)  | 0.26                 | 1.00 (0.98,1.01) | 0.87                 | 1.00 (0.99,1.01)  | 0.81    | 0.45                  | 1.01 (0.99,1.01) |       |
| A/G vs. GG Total Effect            | 1.30 (1.15,1.47) | 4.2x10 <sup>-5</sup> | 1.10 (0.98,1.23)  | 0.09                 | 1.24 (1.10,1.38) | 2.7x10 <sup>-4</sup> | 1.42 (1.07,1.87)  | 0.01    | 1.8x10 <sup>-5</sup>  | 1.21 (1.13,1.29) | 1.2:  |
| Proportion Mediated                | 4.1%             |                      | 9.3%              |                      | 0.0%             |                      | 0.5%              |         |                       | 3.0%             |       |
| A/A vs. GG Direct Effect           | 1.66 (1.30,2.12) | 5.8x10 <sup>-5</sup> | 1.20 (0.97,1.48)  | 0.10                 | 1.53 (1.22,1.91) | 1.8x10 <sup>-4</sup> | 2.00 (1.15,3.48)  | 0.01    | 1.8x10 <sup>-5</sup>  | 1.44 (1.27,1.64) | 1.4:  |
| A/A vs. GG Indirect Effect         | 1.02 (0.99,1.06) | 0.20                 | 1.02 (0.98,1.06)  | 0.26                 | 1.00 (0.96,1.03) | 0.88                 | 1.00 (0.97,1.04)  | 0.82    | 0.43                  | 1.01 (0.99,1.03) |       |
| A/A vs. GG Total Effect            | 1.70 (1.33,1.17) | 2.3x10 <sup>-5</sup> | 1.22 (0.99,1.51)  | 0.07                 | 1.53 (1.22,1.91) | 2.4x10 <sup>-4</sup> | 2.01 (1.16,3.47)  | 0.01    | 1.2x10 <sup>-5</sup>  | 1.46 (1.29,1.66) | 5.1:  |
| Proportion Mediated                | 5.7%             |                      | 11.1%             |                      | 0.0%             |                      | 0.7%              |         |                       | 4.0%             |       |
| Additive Interaction               | 0.05 (0.02,0.09) | 4x10 <sup>-3</sup>   | 0.05 (0.03,0.08)  | 1.8x10 <sup>-5</sup> | 0.07 (0.04,0.11) | 6.0x10 <sup>-5</sup> | 0.01 (-0.10,0.13) | 0.85    | 1.1x10 <sup>-7</sup>  | 0.06 (0.04,0.08) | 1.4:  |
| Multiplicative Interaction         | 1.03 (0.98,1.08) | 0.26                 | 1.05 (1.01, 1.09) | 0.01                 | 1.03 (0.97,1.10) | 0.34                 | 1.01 (0.90,1.12)  | 0.95    | 0.03                  | 1.04 (1.00,1.07) |       |
